# Supplementary material for: Preoperative waiting time increased the risk of periprosthetic infection in patients with femoral neck fracture
Source: PubMed Central journal article supplement — Acta Orthop. 2013 Apr 18;84(2):124–9. doi: 10.3109/17453674.2013.775044 (PMC3639331; doi:10.3109/17453674.2013.775044), 2013-04-18
Supplement: ORT-84-124-s5748.pdf [file ORT-84-124-s5748.pdf]

## Supplementary article data

# Preoperative waiting time increased the risk of periprosthetic infection in patients with femoral neck fracture

Marianne Westberg<sup>1</sup>, Finnur Snorrason<sup>2</sup>, and Frede Frihagen<sup>1</sup>

<sup>1</sup>Department of Orthopaedics, Oslo University Hospital, Oslo; <sup>2</sup>Department of Orthopaedics, Drammen Hospital, Drammen, Norway.

Correspondence: marianne.westberg@oslo-universitetssykehus.no

Submitted 12-07-12. Accepted 12-12-11

Table 5. Details of clinical data for 17 patients with PJI

| Case | Age | Sex | Comorbidity                                                                                                                                           | End result                                           | Time from surgery to death |
|------|-----|-----|-------------------------------------------------------------------------------------------------------------------------------------------------------|------------------------------------------------------|----------------------------|
| 1    | 83  | M   | HT, COPD, iron deficiency anemia. Hospitalized for pneumonia and norovirus gastroenteritis.                                                           | Irrigation and debridement                           | Alive                      |
| 2    | 82  | F   | Recurrent UTI. Treated with AB for UTI post-op.                                                                                                       | Irrigation and debridement                           | Alive                      |
| 3    | 87  | M   | None                                                                                                                                                  | Resection arthroplasty                               | 1.7 months                 |
| 4    | 81  | F   | Diabetes. Post-op. UTI. Recently operated other hip because of hip fracture                                                                           | Multiple organ failure<br>Resection arthroplasty     | 0.8 months                 |
| 5    | 75  | F   | RA, HT                                                                                                                                                | Irrigation and debridement                           | Alive                      |
| 6    | 87  | F   | Diabetes, coronary heart disease, HT, COPD. Post-op. pneumonia and <i>C. difficile</i> infection                                                      | Resection arthroplasty.<br>Severe illness.           | 4 months                   |
| 7    | 77  | F   | RA, HT, adiposity, liver cirrhosis.                                                                                                                   | Irrigation and debridement                           | Alive                      |
| 8    | 85  | F   | RA, coronary heart disease.<br>Post-op. pneumonia and myocardial infarction.                                                                          | Irrigation and debridement<br>Multiple organ failure | 1.5 months                 |
| 9    | 71  | M   | Alcoholism. HT, atrial fibrillation, adiposity.                                                                                                       | Antibiotic suppression                               | Alive                      |
| 10   | 77  | M   | HT, several minor cerebral strokes.                                                                                                                   | Irrigation and debridement                           | Alive                      |
| 11   | 84  | M   | Severe Alzheimer's disease, prostate cancer.                                                                                                          | Irrigation and debridement                           | 5 months                   |
| 12   | 73  | F   | Diabetes, HT, Bechterew's disease. Hospitalized for pneumonia and pyothorax.                                                                          | 2-stage revision surgery                             | Alive                      |
| 13   | 85  | F   | Recurrent UTI, asthma, depression, dementia.                                                                                                          | Irrigation and debridement                           | 12 months                  |
| 14   | 79  | F   | Hospitalized for incurable cholangiocarcinoma.                                                                                                        | Antibiotic suppression                               | 3 months                   |
| 15   | 49  | M   | Alcoholism, liver cirrhosis, obesity, renal failure.                                                                                                  | Resection arthroplasty                               | Alive                      |
| 16   | 81  | F   | HT, Parkinson's disease, depression. Hospitalized for a stable C2 (dens) fracture. Post-op. UTI, <i>C. difficile</i> infection, and severe psychosis. | Antibiotic suppression                               | 6 months                   |
| 17   | 79  | F   | Diabetes, dementia. Recently hospitalized for a myocardial infarction and operated for an elbow fracture. Post-op. pneumonia.                         | Resection arthroplasty                               | Alive                      |

HT: hypertension; COPD: chronic obstructive pulmonary disease; UTI: urinary tract infection; AB: antibiotic treatment; RA: rheumatoid arthritis; *C. difficile*: Clostridium difficile.
